# Supplementary material
Source: PubMed Central journal article supplement (PMC3021017)
Supplement: 1011867108_pnas.1011867108_SI.pdf [file 1011867108_pnas.1011867108_SI.pdf]

# Supporting Information

Karagöz et al. 10.1073/pnas.1011867108

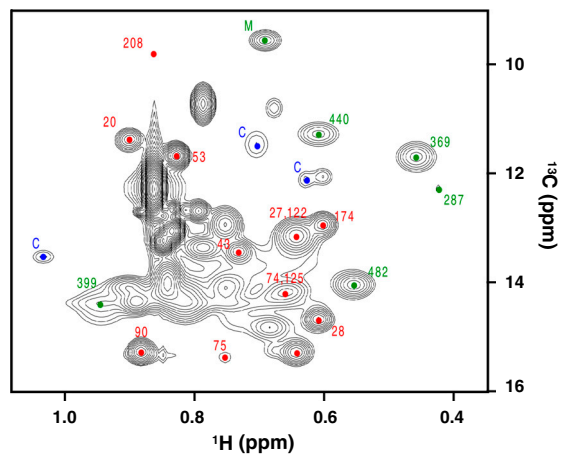

Fig. S1. Assignment of isoleucine residues in  $^1\text{H}$ - $^{13}\text{C}$ -Ile methyl-transverse-relaxation optimized spectroscopy.  $^1\text{H}$ - $^{13}\text{C}$ -Ile methyl-TROSY cross-peaks of full-length Hsp90. For the isoleucines that were unambiguously assigned the residue number is indicated. Allocation to an individual domain is represented by a colored dot (Hsp90-N, red; Hsp90-M, green; Hsp90-C, blue).
